# Supplementary material for: Copper catalyzed nitrile synthesis from aryl halides using formamide as a nitrile source
Source: Royal Society of Chemistry journal article supplement (doi:10.1039/c3ra48075e), 2014-01-01

## Supporting Information

### Copper catalyzed nitrile synthesis from aryl halides using formamide as a nitrile source

Ashok B. Khemnar and Bhalchandra M. Bhanage\*

Department of Chemistry, Institute of Chemical Technology

Matunga, Mumbai-400019. India.

Fax: +91 22 3361 1020

E-mail: [bm.bhanage@gmail.com](mailto:bm.bhanage@gmail.com), [bm.bhanage@ictmumbai.edu.in](mailto:bm.bhanage@ictmumbai.edu.in)

#### Table of Contents

|                                                                         |        |
|-------------------------------------------------------------------------|--------|
| I. General Information.....                                             | S2     |
| II. General experimental procedure for nitrile synthesis.....           | S2     |
| III. <sup>1</sup> H NMR and <sup>13</sup> C NMR data of products.....   | S3-S4  |
| IV. <sup>1</sup> H NMR and <sup>13</sup> C NMR copies of products ..... | S5-S12 |

## General information

### Materials and Methods:

All the reagents were purchased from Sigma-Aldrich and Alfa Aesar. The solvents were purchased from commercial suppliers and used without further purification. GC equipped with flame ionization detector and a capillary column (Elite-1, 30 m × 0.32 mm × 0.25 μm) was used for gas chromatography analysis. The mass of the products were identified using GC-MS-QP 2010 instrument (Rtx-17, 30 m × 25 mm ID, film thickness (df) = 0.25 μm) (column flow 2 mLmin<sup>-1</sup>, 80 °C to 240 °C at 10 °C/min rise). The products were purified by column chromatography on silica gel (100-200 mesh). The <sup>1</sup>H NMR spectra was recorded at 400 MHz spectrometer in CDCl<sub>3</sub> using TMS as an internal standard. The <sup>13</sup>C NMR spectra were recorded at 100 MHz in CDCl<sub>3</sub> using TMS as an internal standard. Chemical shifts are reported in parts per million (δ) relative to tetramethylsilane as internal standard. *J* (coupling constant) values were reported in Hz. Splitting patterns of proton are described as bs (broad singlet), s (singlet), d (doublet), t (triplet) and m (multiplet). The products were confirmed by the comparison of their GC-MS spectra, <sup>1</sup>H and <sup>13</sup>C NMR spectra with those of authentic data.

### General experimental procedure for nitrile synthesis from aryl halide:

The 4-iodotoluene (**1a**, 1 mmol), CuI (20 mol%) and PPh<sub>3</sub> (20 mol%) were added in formamide (10 mLmmol<sup>-1</sup>) into two-necked round-bottomed flask (25 mL) equipped with a condenser at room temperature under nitrogen atmosphere. The mixture was stirred for 2–3 minutes at room temperature and POCl<sub>3</sub> (2 mmol) was added to the reaction mixture. The reaction flask equipped with a condenser placed in oil bath and stirred the reaction mixture for 24 h at 140 °C under nitrogen atmosphere. After cooling to room temperature, the resultant mixture was added to saturated solution of NaHCO<sub>3</sub> (50 mL) and extracted with diethyl ether (3×15 mL). The organic layer was dried over anhydrous Na<sub>2</sub>SO<sub>4</sub> and it was evaporated under reduced pressure. The GC yield is quantified by using the external standard method using *p*-tolunitrile. The residue was then purified by column chromatography on silica gel (100-200 mesh; petroleum ether/ethyl acetate) and the products were confirmed by GCMS, <sup>1</sup>H and <sup>13</sup>C NMR spectroscopic analysis.

## Spectral data:

### 4-Methylbenzonitrile (3a)

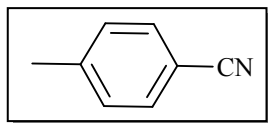

Colourless liquid;  $^1\text{H NMR}$  ( $\text{CDCl}_3$ , 400 MHz)  $\delta$  7.53 (d,  $J = 8$  Hz, 2H), 7.27 (d,  $J = 8$  Hz, 2H), 2.42 (s, 3H).  $^{13}\text{C NMR}$  ( $\text{CDCl}_3$ , 100 MHz)  $\delta$  143.74, 132.02, 129.96, 119.16, 109.28, 21.82. GC-MS (EI):  $m/z$  117(100) [ $\text{M}]^+$ , 116 (55.1), 90 (36.6), 63 (18.7).

### Benzonitrile (3c)

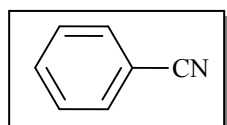

Colourless liquid;  $^1\text{H NMR}$  ( $\text{CDCl}_3$ , 400 MHz)  $\delta$  7.68-7.65 (m, 2H), 7.61 (t,  $J = 7.6$  Hz, 1H), 7.48 (t,  $J = 7.6$  Hz, 2H).  $^{13}\text{C NMR}$  ( $\text{CDCl}_3$ , 100 MHz)  $\delta$  132.77, 132.17, 129.12, 118.85, 112.48. GC-MS (EI):  $m/z$  103(100) [ $\text{M}]^+$ , 76 (38.8), 50 (12).

### 2-Methoxybenzonitrile (3e)

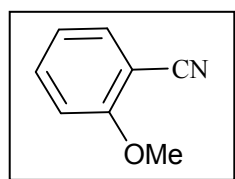

Light yellow solid;  $^1\text{H NMR}$  ( $\text{CDCl}_3$ , 400 MHz)  $\delta$  7.57-7.53 (m, 2H), 7.03-6.97 (m, 2H), 3.93 (s, 3H).  $^{13}\text{C NMR}$  ( $\text{CDCl}_3$ , 100 MHz)  $\delta$  161.23, 134.43, 133.74, 120.77, 116.53, 111.31, 101.76, 56.00. GC-MS (EI):  $m/z$  133(100) [ $\text{M}]^+$ , 105 (49.8), 90 (51.5), 77(23.5), 63(42.5), 51(16.5).

### 1-Naphthonitrile (3f)

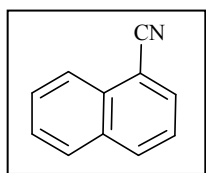

White solid;  $^1\text{H NMR}$  ( $\text{CDCl}_3$ , 400 MHz)  $\delta$  8.23 (d,  $J = 8.4$  Hz, 1H), 8.07 (d,  $J = 8.4$  Hz, 1H), 7.93-7.90 (m, 2H), 7.69 (t,  $J = 7.2$  Hz, 1H), 7.62 (t,  $J = 7.2$  Hz, 1H), 7.52 (t,  $J = 8$  Hz, 1H).  $^{13}\text{C NMR}$  ( $\text{CDCl}_3$ , 100 MHz)  $\delta$  133.28, 132.92, 132.63, 132.36, 128.66, 128.60, 127.55, 125.12, 124.92, 117.82, 110.19. GC-MS (EI):  $m/z$  153(100) [ $\text{M}]^+$ , 126 (25.4), 63 (10.9).

### 3-Chlorobenzonitrile (3k)

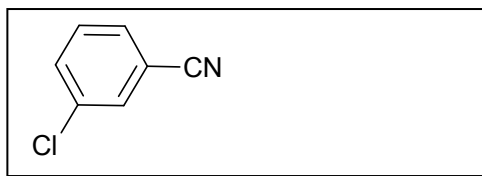

White solid;  $^1\text{H NMR}$  ( $\text{CDCl}_3$ , 400 MHz)  $\delta$  7.65-7.64 (m, 1H), 7.61-7.56 (m, 2H), 7.44 (t,  $J = 8$  Hz, 1H).  $^{13}\text{C NMR}$  ( $\text{CDCl}_3$ , 100 MHz)  $\delta$  135.26, 133.25, 131.94, 130.51, 130.31, 117.45, 113.98. GC-MS (EI):  $m/z$  137 (100)  $[\text{M}]^+$ , 102 (30.4), 75 (14).

### 4-(trifluoromethyl)benzonitrile (3l)

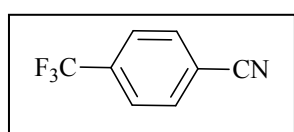

White solid;  $^1\text{H NMR}$  ( $\text{CDCl}_3$ , 400 MHz)  $\delta$  7.82 (d,  $J = 8.4$  Hz, 2H), 7.77 (d,  $J = 8.4$  Hz, 2H).  $^{13}\text{C NMR}$  ( $\text{CDCl}_3$ , 100 MHz)  $\delta$  134.44, 132.76, 126.27, 124.48, 117.50, 116.14. GC-MS (EI):  $m/z$  171 (100)  $[\text{M}]^+$ , 170 (23.2), 152 (38.4), 121 (56.7), 102 (10.3), 76 (10.6), 44 (17.1).

### 4-Hydroxybenzonitrile (3m)

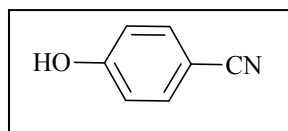

White solid;  $^1\text{H NMR}$  ( $\text{CDCl}_3$ , 400 MHz)  $\delta$  7.56 (d,  $J = 8.8$  Hz, 2H), 6.95 (d,  $J = 8.8$  Hz, 2H).  $^{13}\text{C NMR}$  ( $\text{CDCl}_3$ , 100 MHz)  $\delta$  160.38, 134.35, 119.30, 116.51, 102.86. GC-MS (EI):  $m/z$  119 (100)  $[\text{M}]^+$ , 91 (27.2), 64 (30.3), 63 (17.7), 44 (11.5).

### 1H-Indole-5-carbonitrile (3n)

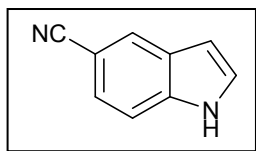

Yellowish solid;  $^1\text{H NMR}$  ( $\text{CDCl}_3$ , 400 MHz)  $\delta$  8.79 (bs, 1H), 7.99 (s, 1H), 7.48 (d,  $J = 8.4$  Hz, 1H), 7.41 (dd,  $J = 8.4, 1.2$  Hz, 1H), 7.35 (t,  $J = 2.8$  Hz, 1H), 6.63-6.62 (m, 1H).  $^{13}\text{C NMR}$  ( $\text{CDCl}_3$ , 100 MHz)  $\delta$  137.55, 127.67, 126.57, 126.39, 124.80, 120.95, 112.08, 103.35, 102.95. GC-MS (EI):  $m/z$  142 (100)  $[\text{M}]^+$ , 115 (38.3), 114 (18), 89 (10), 88 (14.5), 45 (18.3), 44 (11.4).

## $^1\text{H}$ and $^{13}\text{C}$ NMR Spectra of Products:

### 4-Methylbenzonitrile ( $^1\text{H}$ NMR) (3a)

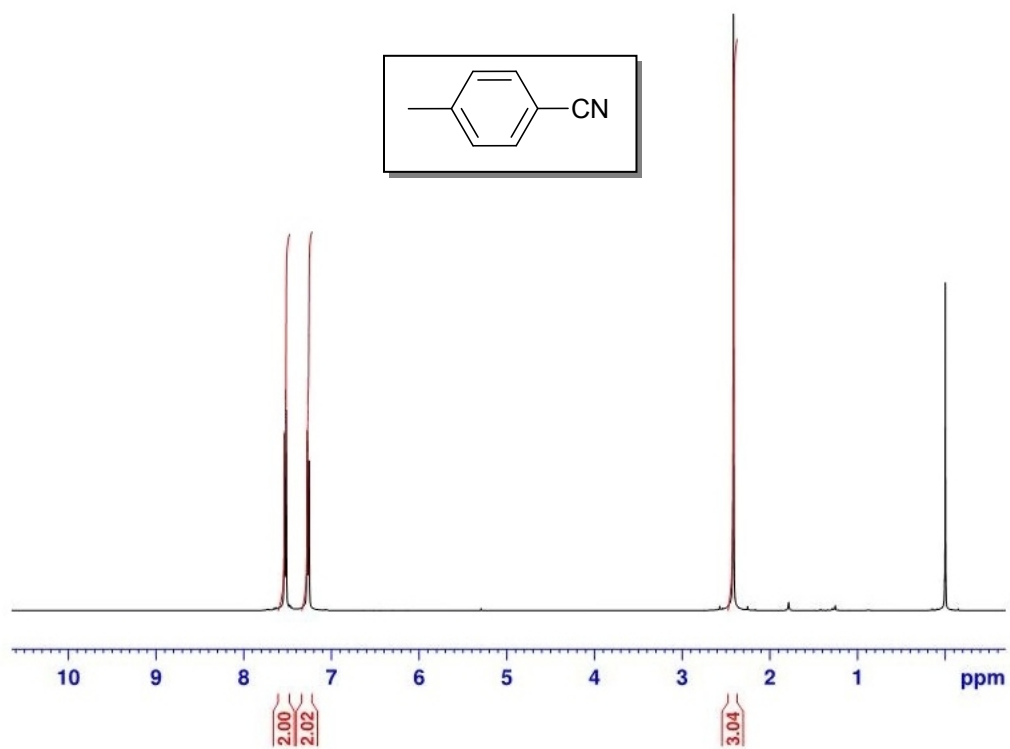

### 4-Methylbenzonitrile ( $^{13}\text{C}$ NMR) (3a)

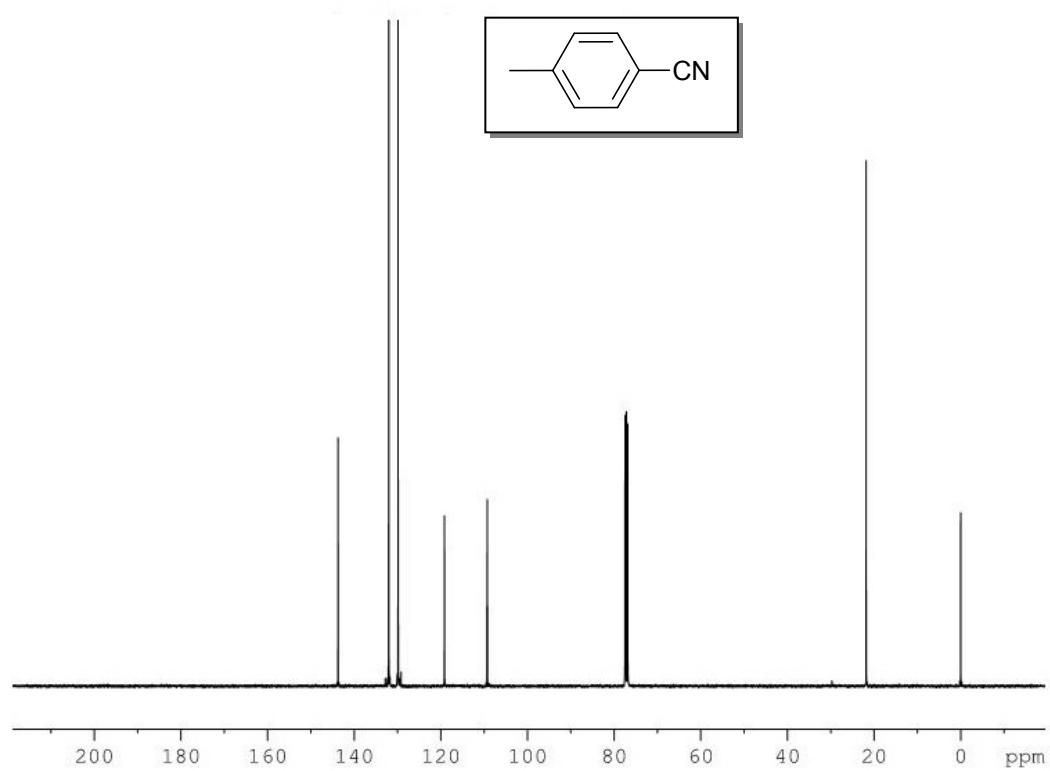

**Benzonitrile ( $^1\text{H}$  NMR) (3c)**

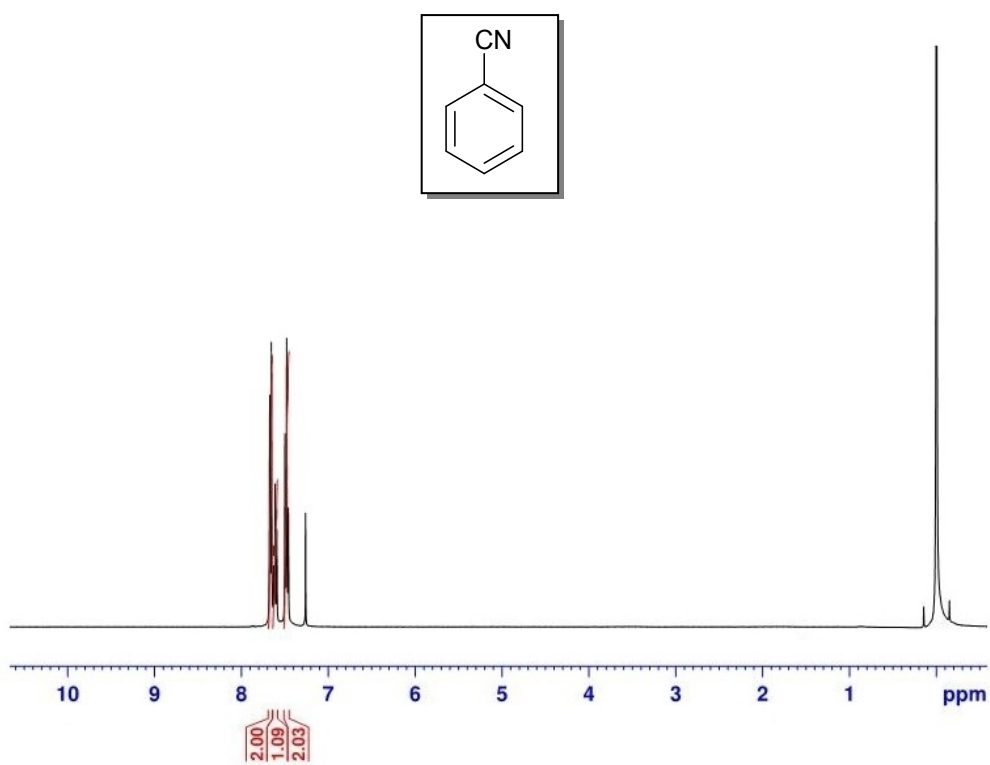

**Benzonitrile ( $^{13}\text{C}$  NMR) (3c)**

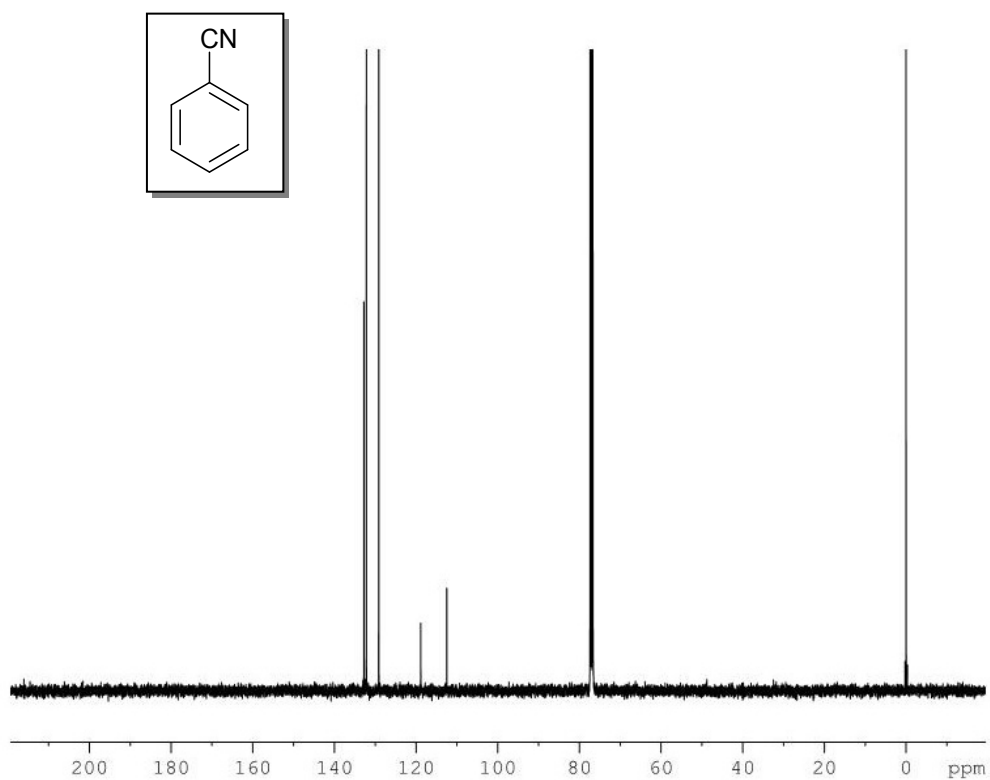

### 2-Methoxybenzonitrile (<sup>1</sup>H NMR) (3e)

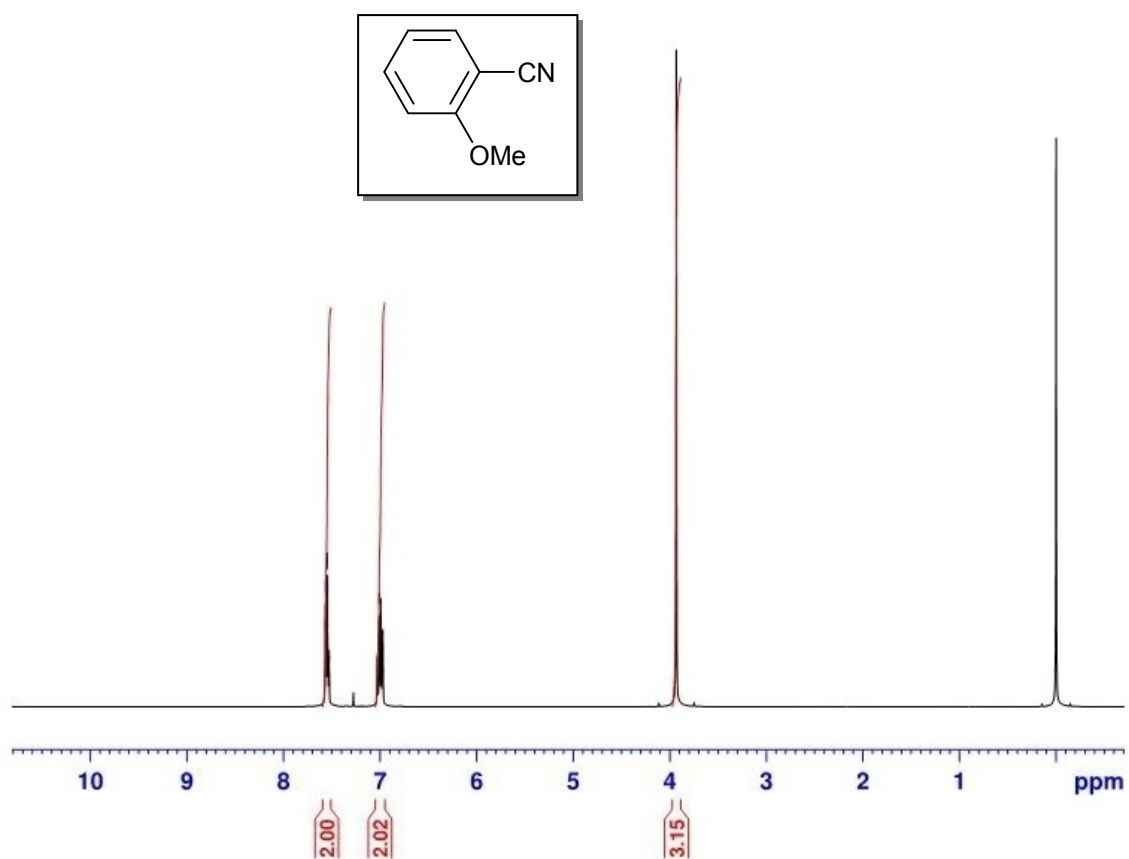

### 2-Methoxybenzonitrile (<sup>13</sup>C NMR) (3e)

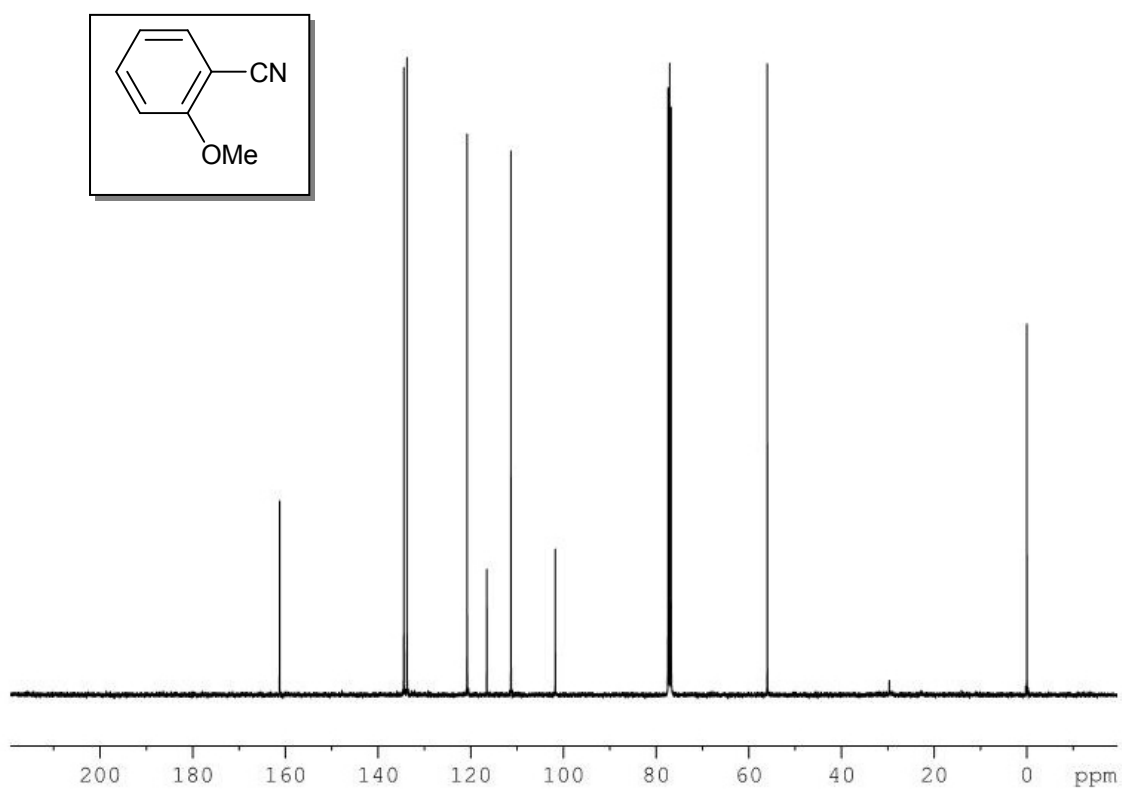

### 1-Naphthonitrile ( $^1\text{H}$ NMR) (3f)

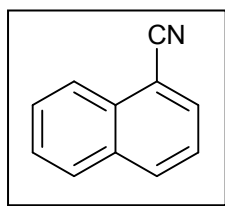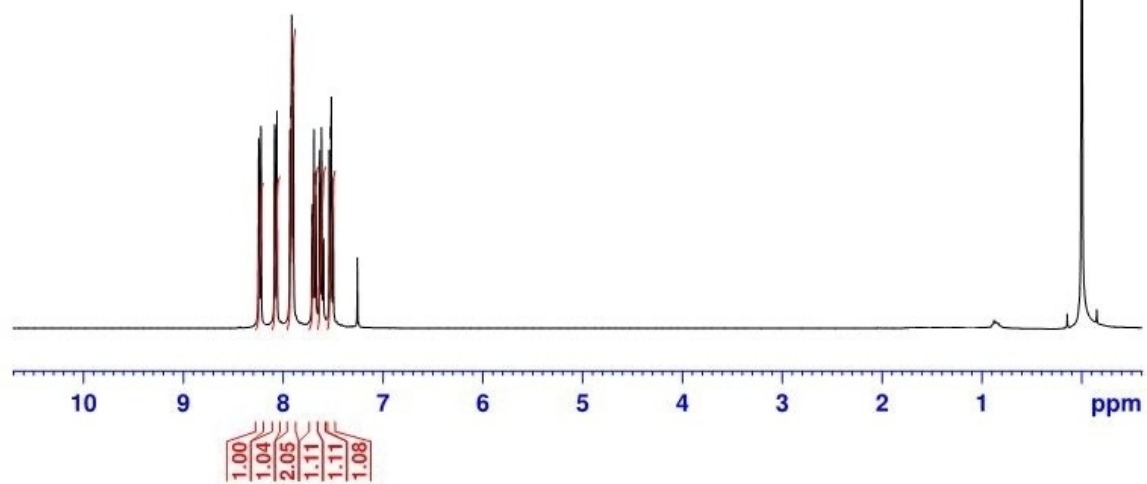

### 1-Naphthonitrile ( $^{13}\text{C}$ NMR) (3f)

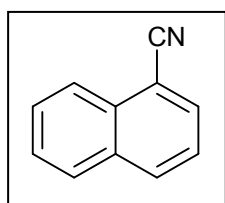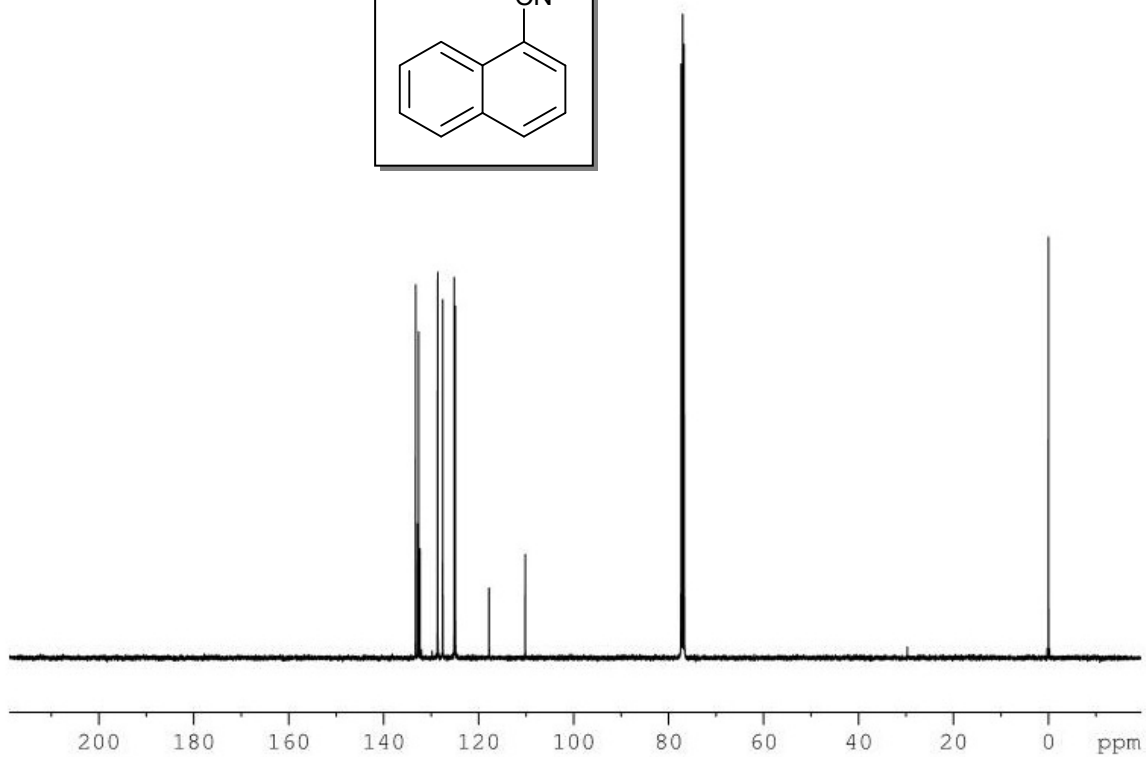



### 3-Chlorobenzonitrile ( $^1\text{H}$ NMR) (3k)

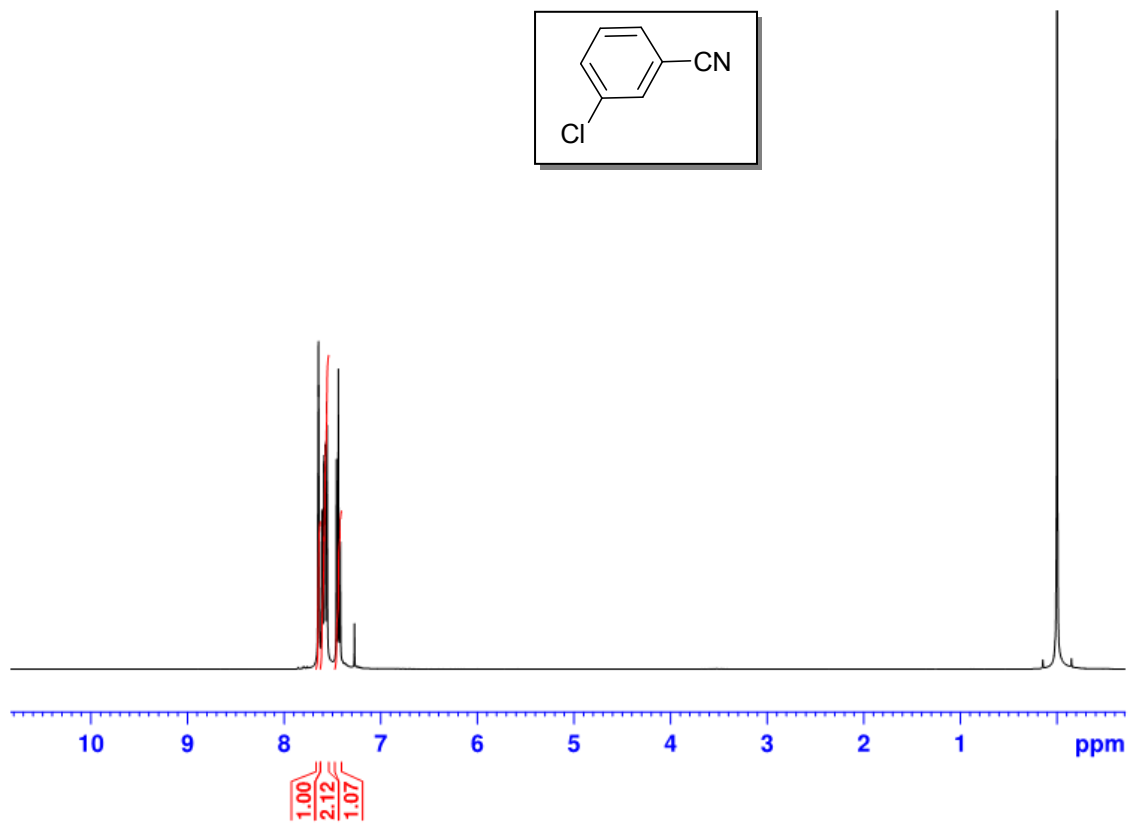

### 3-Chlorobenzonitrile ( $^{13}\text{C}$ NMR) (3k)

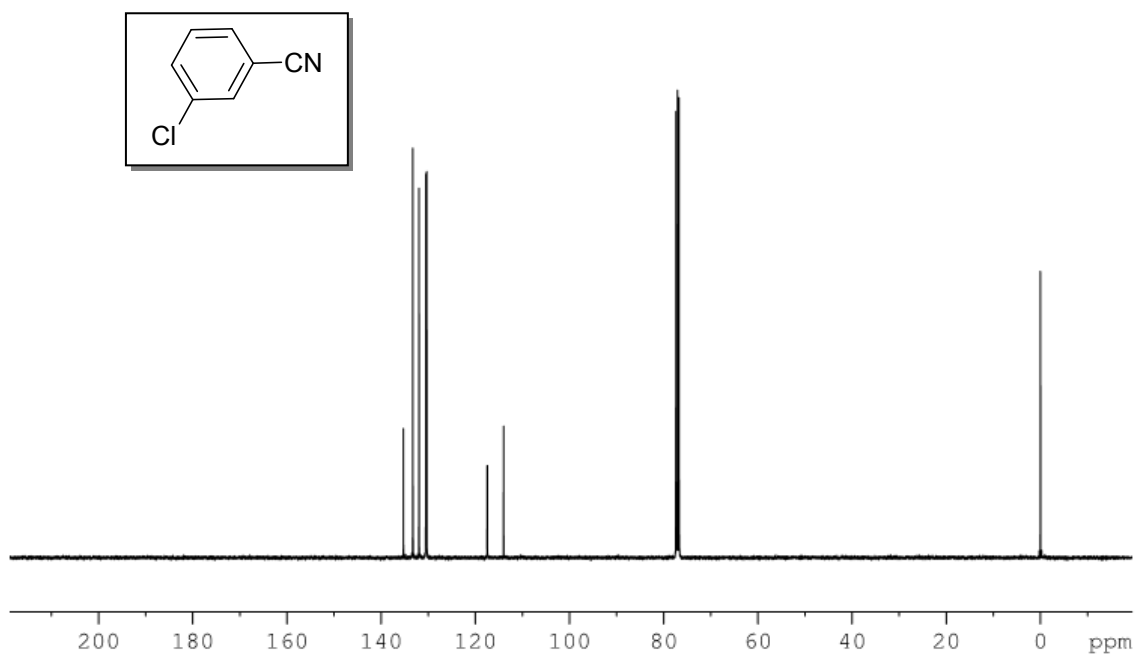

**4-(trifluoromethyl)benzonitrile (<sup>1</sup>H NMR) (3I)**

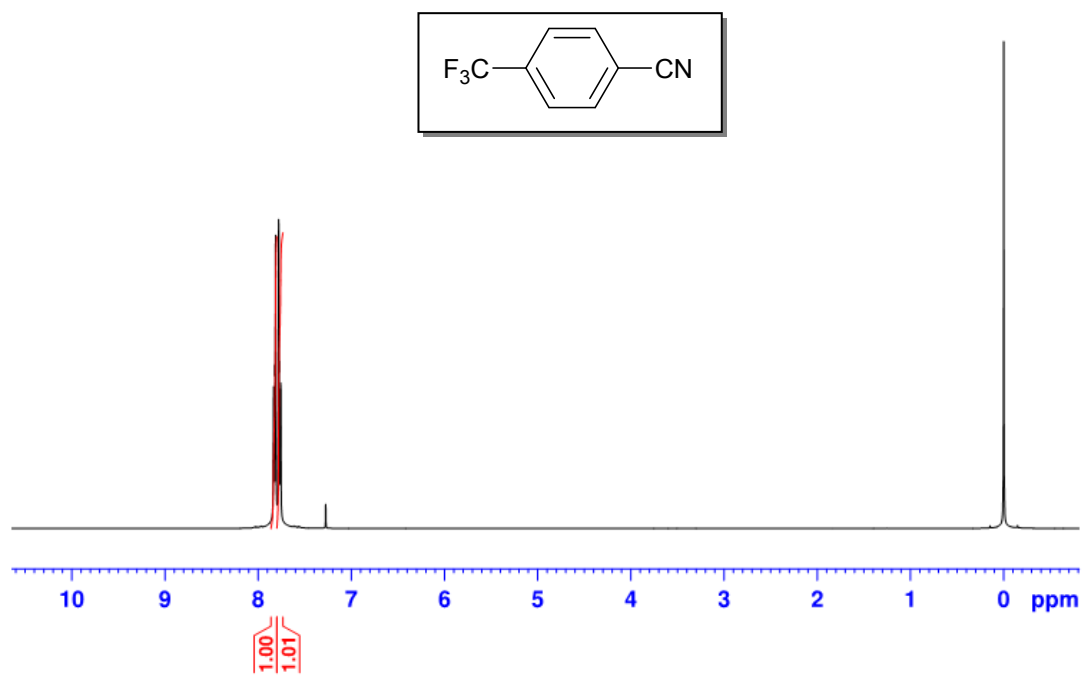

**4-(trifluoromethyl)benzonitrile (<sup>13</sup>C NMR) (3I)**

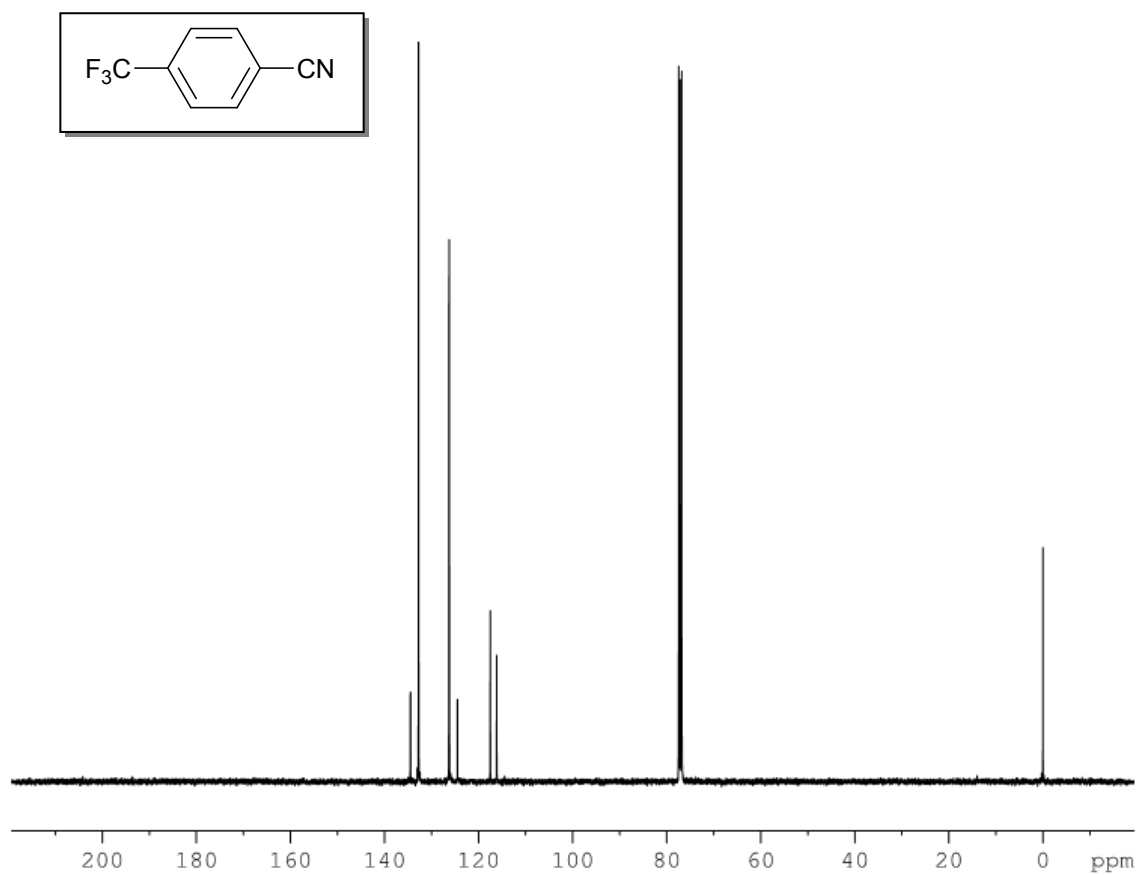

### 4-Hydroxybenzonitrile (<sup>1</sup>H NMR) (3m)

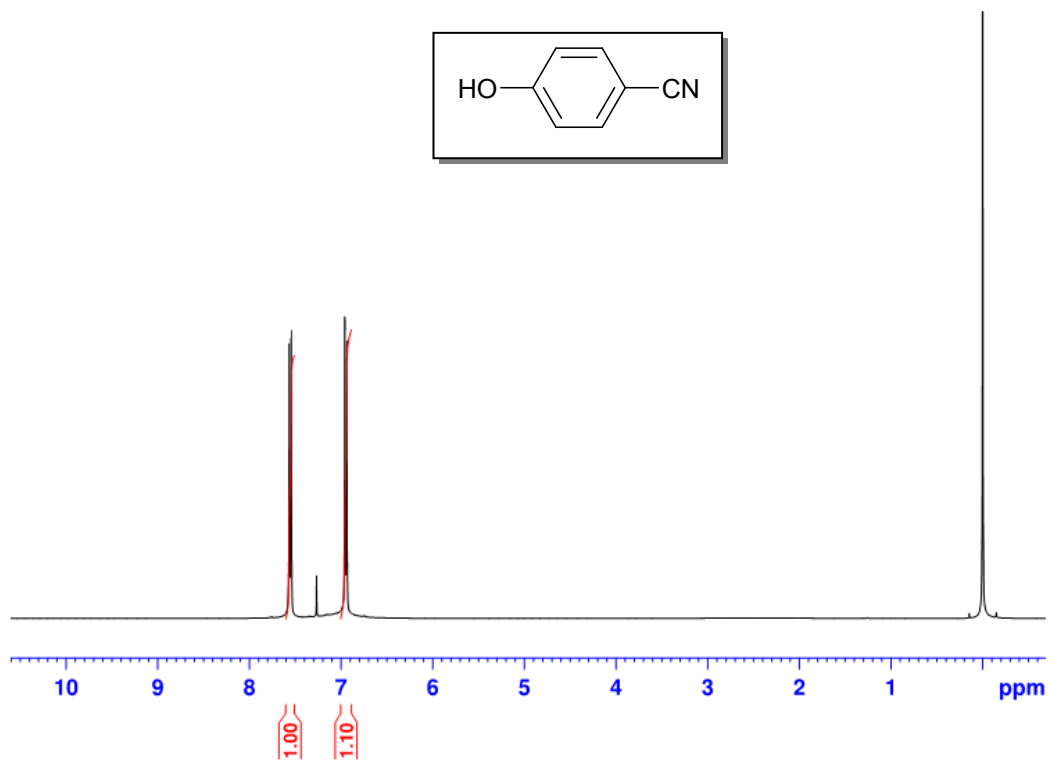

### 4-Hydroxybenzonitrile (<sup>13</sup>C NMR) (3m)

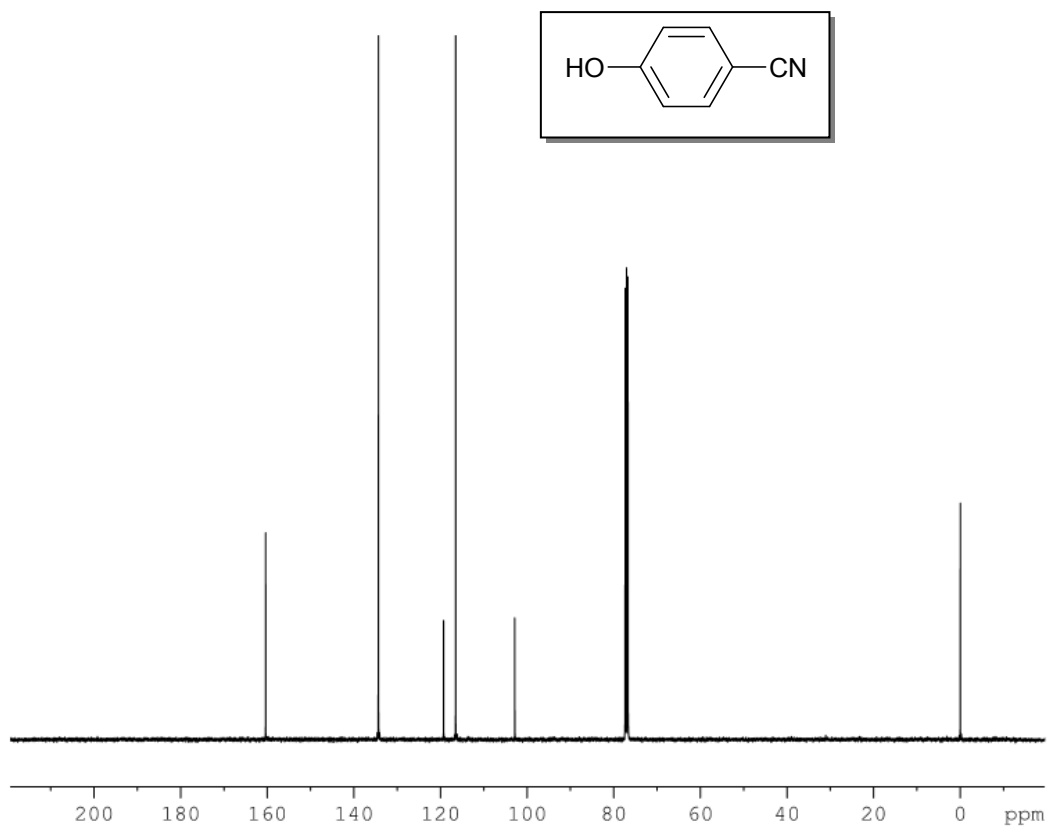

### 1H-Indole-5-carbonitrile (<sup>1</sup>H NMR) (3n)

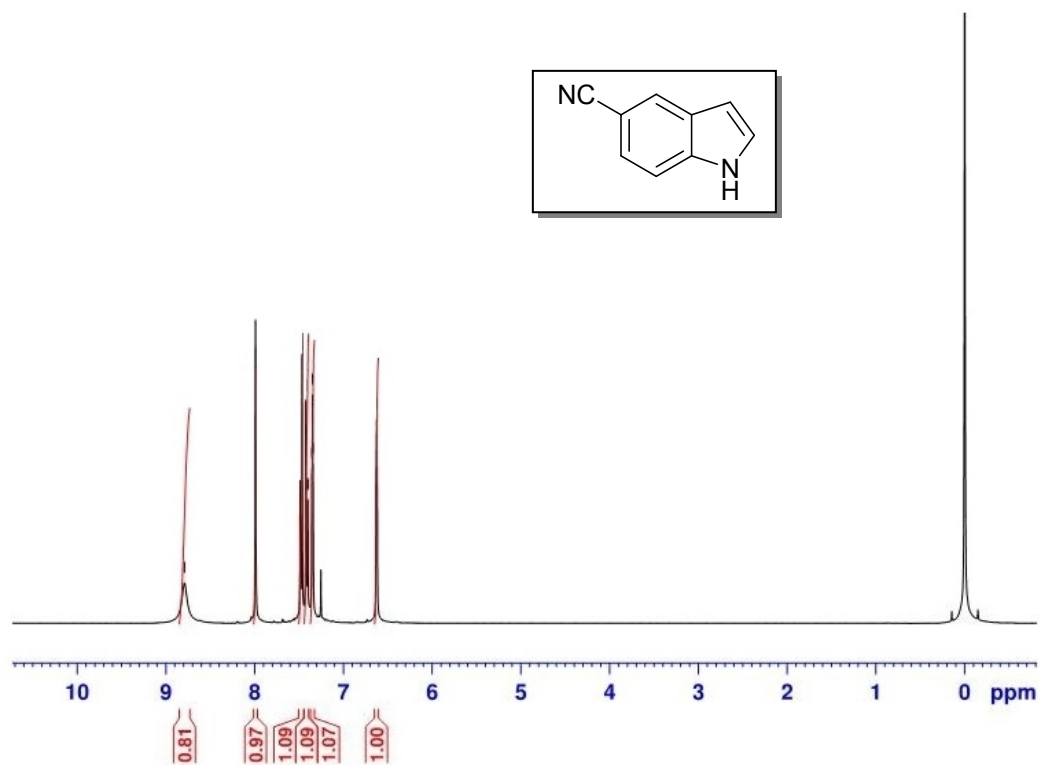

### 1H-Indole-5-carbonitrile (<sup>13</sup>C NMR) (3n)

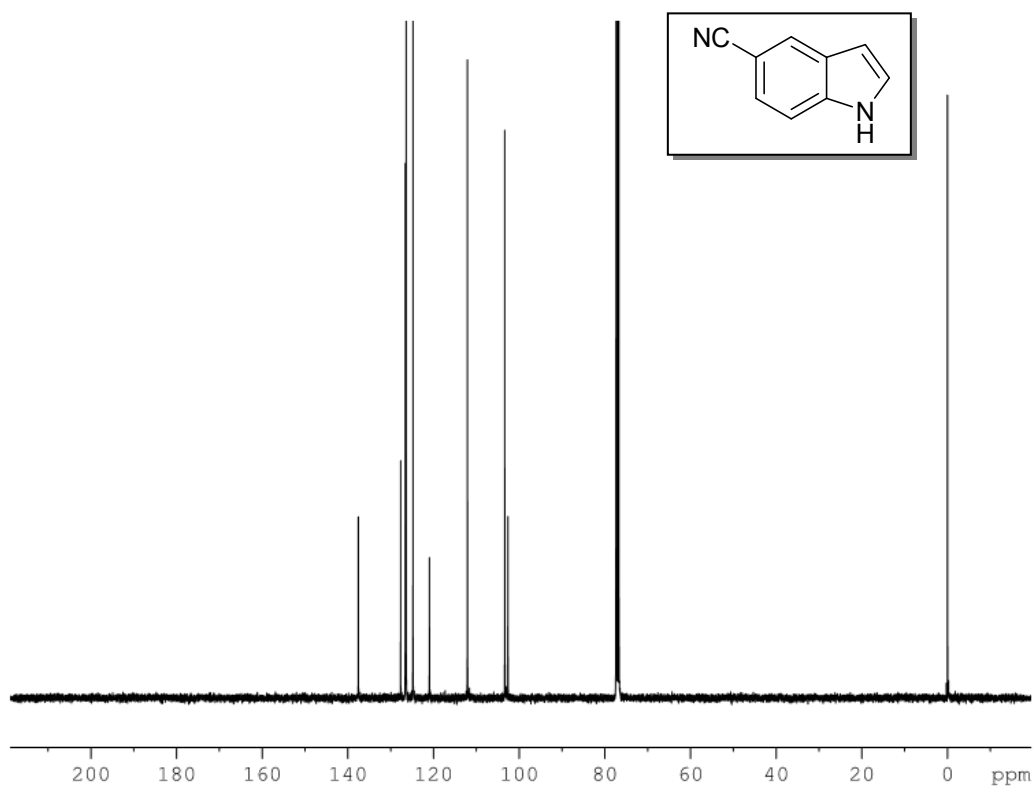

Supplement: c3ra48075e1.pdf [file c3ra48075e1.pdf]
